# Supplementary material for: Occurrence of Chicken Infectious Anemia Virus in Industrial and Backyard Tunisian Broilers: Preliminary Results
Source: MDPI journal article supplement (doi:10.3390/ani12010062), 2021-12-28
Supplement: s1 [file s1]

Supplementary Material

# Occurrence of Chicken Infectious Anemia Virus in Industrial and Backyard Tunisian Broilers: Preliminary Results

Antonietta Di Francesco <sup>1,\*</sup>, Giulia Quaglia <sup>1</sup>, Daniela Salvatore <sup>1</sup>, Sonia Sakhria <sup>2</sup>, Elena Catelli <sup>1</sup>, Ghaith Bessoussa <sup>3</sup>, Khaled Kaboudi <sup>4</sup>, Nouredine Ben Chehida <sup>2</sup> and Caterina Lupini <sup>1</sup>

<sup>1</sup> Department of Veterinary Medical Sciences, University of Bologna, Ozzano dell'Emilia, 40064 Bologna, Italy; giulia.quaglia2@unibo.it (G.Q.); daniela.salvatore2@unibo.it (D.S.); elena.catelli@unibo.it (E.C.); caterina.lupini@unibo.it (C.L.)

<sup>2</sup> Institute of Veterinary Research of Tunisia, University of Tunis El Manar, Tunis 1006, Tunisia; sakhrias@yahoo.fr (S.S.); nbenchehida@yahoo.fr (N.B.C.)

<sup>3</sup> Commissariat Régional au Développement Agricole, Ben Arous 2063, Tunisia; ghaithbessoussa@hotmail.fr

<sup>4</sup> National School of Veterinary Medicine of Sidi Thabet, University of Manouba, Sidi Thabet 2020, Tunisia; khaled.kaboudi@enmv.uma.tn

\* Correspondence: antoniet.difrancesco@unibo.it

**Citation:** Di Francesco, A.; Quaglia, G.; Salvatore, D.; Sakhria, S.; Catelli, E.; Bessoussa, G.; Kaboudi, K.; Ben Chehida, N.; Lupini, C. Occurrence of Chicken Infectious Anemia Virus in Industrial and Backyard Tunisian Broilers: Preliminary Results. *Animals* **2022**, *12*, 62.

<https://doi.org/10.3390/ani12010062>

Academic Editors: Seiya Yamayoshi and Antonio José Piantino Ferreira

Received: 2 November 2021

Accepted: 25 December 2021

Published: 28 december 2021

**Publisher's Note:** MDPI stays neutral with regard to jurisdictional claims in published maps and institutional affiliations.

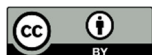

**Copyright:** © 2021 by the authors. Submitted for possible open access publication under the terms and conditions of the Creative Commons Attribution (CC BY) license (<https://creativecommons.org/licenses/by/4.0/>).

**Table S1.** Reference strains from the GenBank database included in the recombination analysis.

| CIAV strain | Country    | GenBank Accession N° |
|-------------|------------|----------------------|
| Del-Ros     | USA        | AF313470             |
| 26P4        | USA        | D10068               |
| Cux-1       | Germany    | M55918               |
| Cuxhaven 1  | Germany    | M81223               |
| CAU269-7    | Australia  | AF227982             |
| 3711        | Australia  | EF683159             |
| BD-3        | Bangladesh | AF395114             |
| 98D02152    | USA        | AF311892             |
| Isolate 4   | Taiwan     | KJ728816             |
| Isolate 6   | Taiwan     | KJ728817             |
| Isolate 8   | Taiwan     | KJ728819             |
| Isolate 7   | Taiwan     | KJ728818             |
| Isolate 9   | Taiwan     | KJ728820             |
| Isolate 18  | Taiwan     | KJ728827             |
| Isolate 20  | Taiwan     | KJ728829             |
| CAV-EG-2    | Egypt      | MH001553             |
| CAV-EG-4    | Egypt      | MH001554             |
| CAV-EG-6    | Egypt      | MH001555             |
| CAV-EG-7    | Egypt      | MH001556             |
| CAV-EG-10   | Egypt      | MH001557             |
| CAV-EG-11   | Egypt      | MH001559             |
| CAV-EG-13   | Egypt      | MH001560             |
| CAV-EG-14   | Egypt      | MH001565             |
| CAV-EG-15   | Egypt      | MH001568             |
| CAV-EG-21   | Egypt      | MH001567             |
| CAV-EG-23   | Egypt      | MH001562             |
| CAV-EG-25   | Egypt      | MH001569             |
| CAV-EG-26   | Egypt      | MH001564             |
| CAV-EG-28   | Egypt      | MH001570             |
| TR20        | Japan      | AB027470             |
| N5          | China      | MK887167             |
| G17.33.3    | Vietnam    | MH536104             |
| AH6         | China      | DQ124935             |
| HLJ15108    | China      | KY486137             |
| LF4         | China      | AY839944             |
| SD1514      | China      | KU645521             |
| 704         | Australia  | U65414               |
| 98D06073    | USA        | AF311900             |
| 1102PT01    | Taiwan     | KY888892             |
| 1103TN02    | Taiwan     | KY888894             |
| SD22        | China      | DQ141673             |
| SD24        | China      | AY999018             |
| 01-4201     | USA        | DQ991394             |
| 17JL0310    | China      | MK089241             |
| 3-1P60      | Malaysia   | AY040632             |
| 1504TW      | Taiwan     | MK358456             |
| 1535TW      | Taiwan     | MN299315             |
| 1637TW      | Taiwan     | MN299310             |
| 1852TW      | Taiwan     | MN299316             |

|                      |             |          |
|----------------------|-------------|----------|
| A2                   | Japan       | AB031296 |
| AH4                  | China       | DQ124936 |
| C14                  | China       | EF176599 |
| CAV/NAM/TANUVAS/09   | India       | KY053900 |
| CAV-10               | Argentina   | KJ872513 |
| CAV-18               | Argentina   | KJ872514 |
| CAV-CA1-2015         | Egypt       | MG827098 |
| CAV-SK4-2017         | Egypt       | MG827100 |
| XH16                 | China       | MK770259 |
| N.A.                 | China       | AF475908 |
| CIAV89-69            | South Korea | JF507715 |
| CIAV-Mouse           | China       | KU645525 |
| G17.33.3             | Vietnam     | MH536104 |
| G6                   | Japan       | AB119448 |
| GD-102               | China       | KU050677 |
| GD-K-12              | China       | KF224935 |
| GX1904A              | China       | MN103402 |
| GX1804               | China       | MK484615 |
| HB1517               | China       | KU645516 |
| HLJ14101             | China       | KY486136 |
| HN1504               | China       | KU645512 |
| JL14028              | China       | KY486148 |
| LN1402               | China       | KU645511 |
| LY-1                 | China       | KX447636 |
| SD1403               | China       | KU221054 |
| SD1505               | China       | KU645523 |
| SD1511               | China       | KU641015 |
| SD1514               | China       | KU645521 |
| SD1518               | China       | KU645522 |
| SH11                 | China       | DQ141670 |
| SH16                 | China       | DQ141671 |
| HN9                  | China       | DQ141672 |
| TJBD33               | China       | AY843527 |
| SDLY08               | China       | FJ172347 |
| 17SY0902             | China       | MK089243 |
| SMSC-1               | Malaysia    | AF285882 |
| SMSC-1P9WT           | Malaysia    | DQ217400 |
| SMSC-1P123WT         | Malaysia    | DQ217401 |
| TN103/11             | Tunisia     | MT019547 |
| TN 126/16            | Tunisia     | MH144347 |
| TN200/11             | Tunisia     | MT019548 |
| TN1021/16            | Tunisia     | MT019549 |
| TN1340/09            | Tunisia     | MT019546 |
| TN 1328/09           | Tunisia     | MN855395 |
| CIAV/IT/CK/909-06/18 | Italy       | MT813068 |
| CIAV/IT/CK/1196/19   | Italy       | MT813069 |
| CIAV/IT/CK/1155/19   | Italy       | MT813070 |
| CIAV/IT/CK/855/17    | Italy       | MT813071 |
| CIAV/IT/CK/1157/19   | Italy       | MT813072 |
| CIAV/IT/CK/986-2/18  | Italy       | MT813073 |
| CIAV/IT/CK/1014-1/18 | Italy       | MT813081 |

---

|                      |       |          |
|----------------------|-------|----------|
| CIAV/IT/CK/1099/19   | Italy | MT813074 |
| CIAV/IT/CK/1153-2/19 | Italy | MT813075 |
| CIAV/IT/CK/1180/19   | Italy | MT813076 |
| CIAV/IT/CK/1186/19   | Italy | MT813077 |
| CIAV/IT/CK/1188/19   | Italy | MT813078 |

---

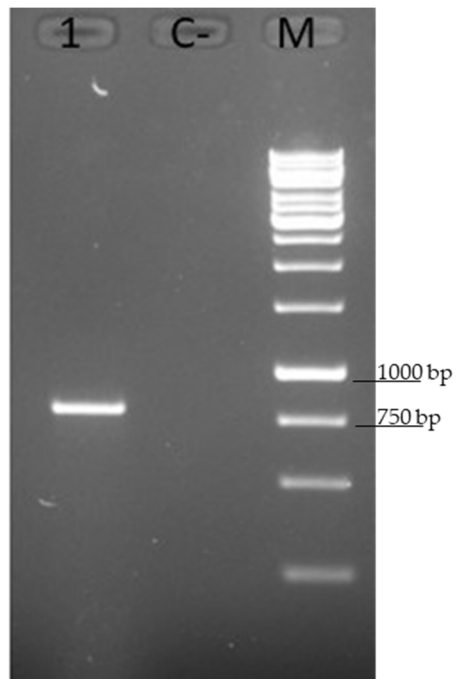

**Figure S1.** Agarose gel of CIAV VP1 nested PCR product. Lane 1: 790 bp purified product; Lane C-: negative control; Lane M: GeneRuler 1kb DNA ladder.

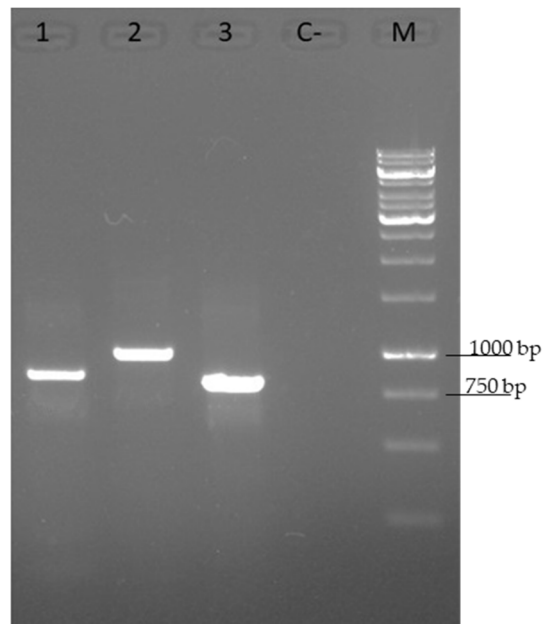

**Figure S2.** Agarose gel of products obtained by three overlapping PCRs to amplify whole CIAV genome. Lane 1: purified product of 843 bp; Lane 2: purified product of 989 bp; Lane 3: purified product of 802 bp; Lane C-: negative control; Lane M: GeneRuler 1 kb DNA ladder.

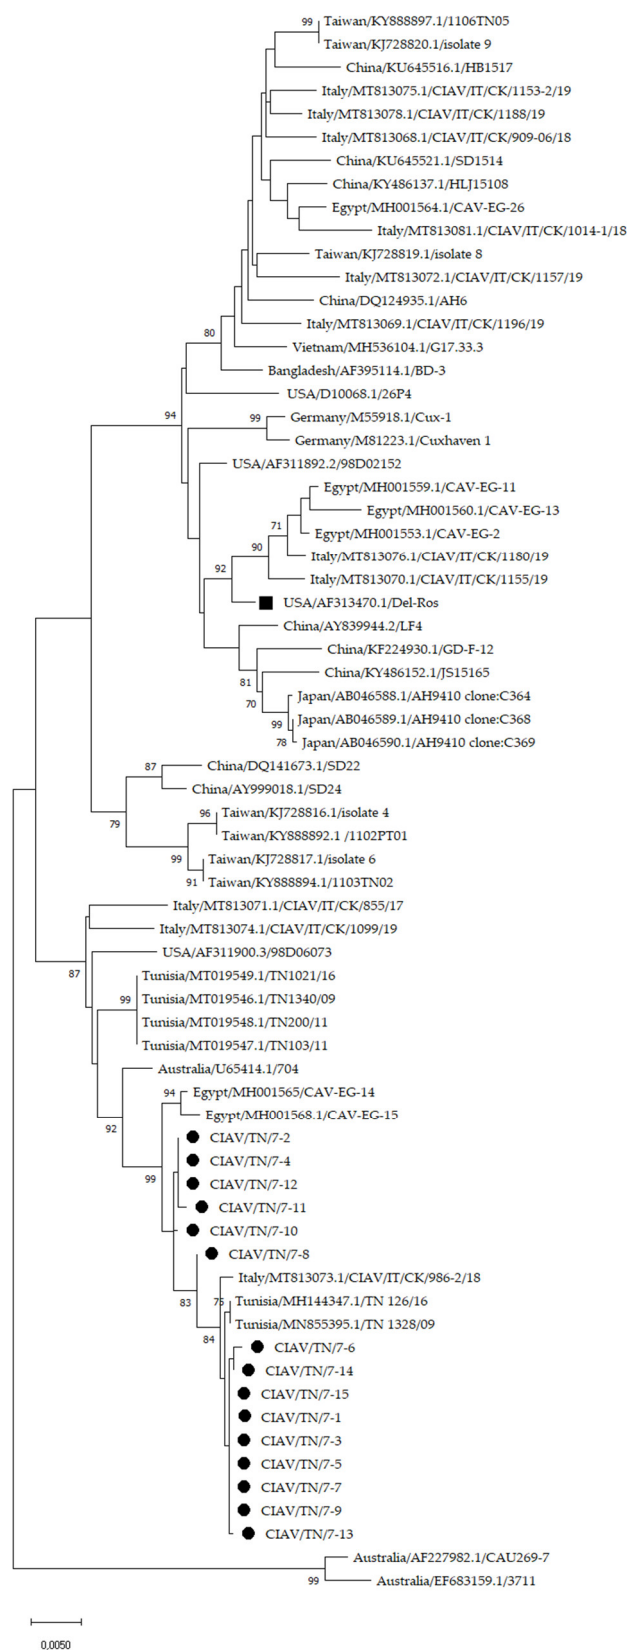

**Figure S3.** Phylogenetic tree based on complete genome sequences (2181 bp) of fifteen Tunisian CIAV samples and CIAV reference strains from the GenBank database. Tunisian CIAV sequences were marked with a black circle. Del-Ros Vaccine strain (GenBank accession No AF313470.1) was marked with a black square. Only bootstrap values  $\geq 70$  were reported. The tree was drawn to scale,

with branch lengths in the same units as those of the evolutionary distances used to infer the phylogenetic tree.
